# Supplementary material for: Large conductance switching nonvolatile memories based on p-ZnS nanoribbon/n-Si heterojunction
Source: Royal Society of Chemistry journal article supplement (doi:10.1039/c2tc00267a), 2012-12-05
Supplement: c2tc00267a.pdf [file c2tc00267a.pdf]

### SUPPORTING INFORMATION

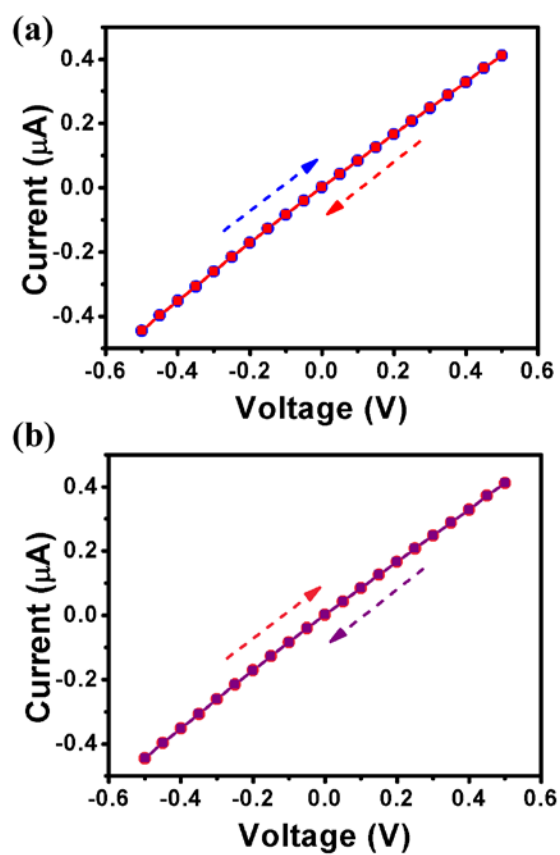

Figure S1. Reciprocating scan on a single ZnS:Cu NR with both ohmic contacts at two ends. The voltage sweeping speed are (a)  $+0.5 \text{ V s}^{-1}$  and (b)  $+0.05 \text{ V s}^{-1}$ , respectively.
